# Supplementary material for: Efficient and transgene-free genome editing in wheat through transient expression of CRISPR/Cas9 DNA or RNA
Source: PubMed Central journal article supplement (PMC5007326; doi:10.1038/ncomms12617), 2016-08-25
Supplement: ncomms12617-s1.pdf [file ncomms12617-s1.pdf]

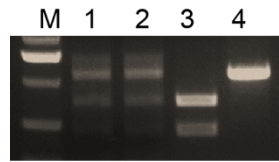

### TaGASR7

CCTCTGCGTGCCGCGGGGCACCTACGGCAACAAGGGCG WT  
 CCTCTGCGTGCCGCC.GGCACCTACGGCAACAAGGGCG -1  
 CCTCTGCGTGCCGCGGLGGCACCTACGGCAACAAGGGCG +1  
 CCTCTGCGTGCCGCGG/GGCACCTACGGCAACAAGGGCG +33  
 CCTCTGCGTGCCGCGG/GGCACCTACGGCAACAAGGGCG +64  
 CCTCTGCGTGCCGCGG/GGCACCTACGGCAACAAGGGCG +62  
 CCTCTGCGTGCCGCGG.....CGGCAACAAGGGCG -8

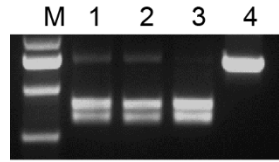

### TaDEP1

GGAAGCACCGGTCTGCGCTTTATTGGTGGATCAGG WT  
 GGAAGCACCGGTC.....TCTTTATTGGTGGATCAGG -6  
 GGAAGCACCGGTC..GCCGTCTTTATTGGTGGATCAGG -2  
 GGAAGCACCGGTCCcTGCCGTCTTTACTGGTGGATCAGG +1  
 GGAAGCACCGGT.CTGCCGTCTTTACTGGTGGATCAGG -1  
 GGAAGCACCGGT....CCGTCTTTATTGGTGGATCAGG -4

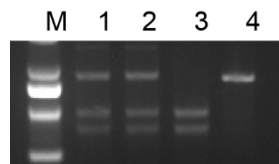

### TaNAC2

GGCGAGGCGCGCACGCCCGAGTCGGAGATCGTCGACAA WT  
 GGCGAGGCGCGCACGCCCGaAGTCGGAGATCGTCGACAA +1  
 GGCGAGGCGCGCACGCCCGtAGTCGGAGATCGTCGACAA +1  
 GGCGAGGCGC.....AGTCGGAGATCGTCGACAA -9  
 GGCGAGGCGCG.....AGTCGGAGATCGTCGACAA -8  
 GGCGAGGCGCGCACGCC.....CGACAA -15  
 GGCGAGGCGCGCACGCCG/AGTCGGAGATCGTCGACAA +44

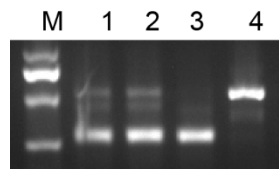

### TaPIN1

CGGCGGCATCACCGTGGGCGCCCAcCAGGCCCGCGG WT  
 CGGCGGCATCACCGTGGGC.....GGCCCGCGG -10  
 CGGCGGCATCACCGTGGGCGCaccg...GGCCCGCGG -8/+4  
 CGGCGGCATCACCGTGGGCGCCG...AGGCCCGCGG -4  
 CGGCGGCATCACCGTGGGCGCC...CAGGCCCGCGG -3  
 CGGCGGCATCACCGTGGGCGCC.....GGCCCGCGG -7

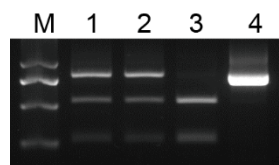

### TaLOX2

CGTCTACGTGCCGCGGACGAGCTCTTCGGCCACCTCA WT  
 CGTCTACGTGCCGCGGACGAGCTC.TCGCCACCTCA -1  
 CGTCTACGTGCCGCGGACGAGCT..TCGGCCACCTCA -2  
 CGTCTACGTGCCGCGGACGAG.....CGGCCACCTCA -5  
 CGTCTACGTGCCGCGGACGAGC...TCGGCCACCTCA -3  
 CGTCTACGTGCCGCGGACGAGC.....GGCCACCTCA -5

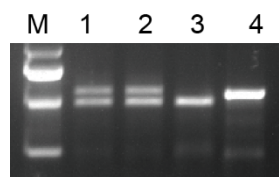

### TaGW2

GCAGCTCCTCCTTAGAAATACCCATCCTGGTGGATT WT  
 GCAGCTCCTCC.....CCCATCCTGGTGGATT -10  
 GCAGCTCCTCC.....CCATCCTGGTGGATT -12  
 GCAGCTCCTCCTA..AATACCCATCCTGGTGGATT -2  
 GCAGCTCCTCCTAAGAAATACCCATCCTGGTGGATT +1  
 GCAGCTCCTCCTA..AATACCCATCCTGGTGGATT -1

**Supplementary Figure 1.** CRISPR/Cas9-induced targeted mutations in *TaGASR7*, *TaDEP1*, *TaNAC2*, *TaPIN1*, *TaLOX2* and *TaGW2* genes in wheat protoplasts. Lanes 1 and 2: digested CRISPR/Cas9-transformed protoplasts; lanes 3 and 4: digested and undigested wild type controls; M: marker. Sequences of CRISPR/Cas9-induced mutations are shown on the right. The wild type sequences are shown at the top of each sequence group. The numbers at the sides indicate the type of mutations and how many nucleotides are involved.

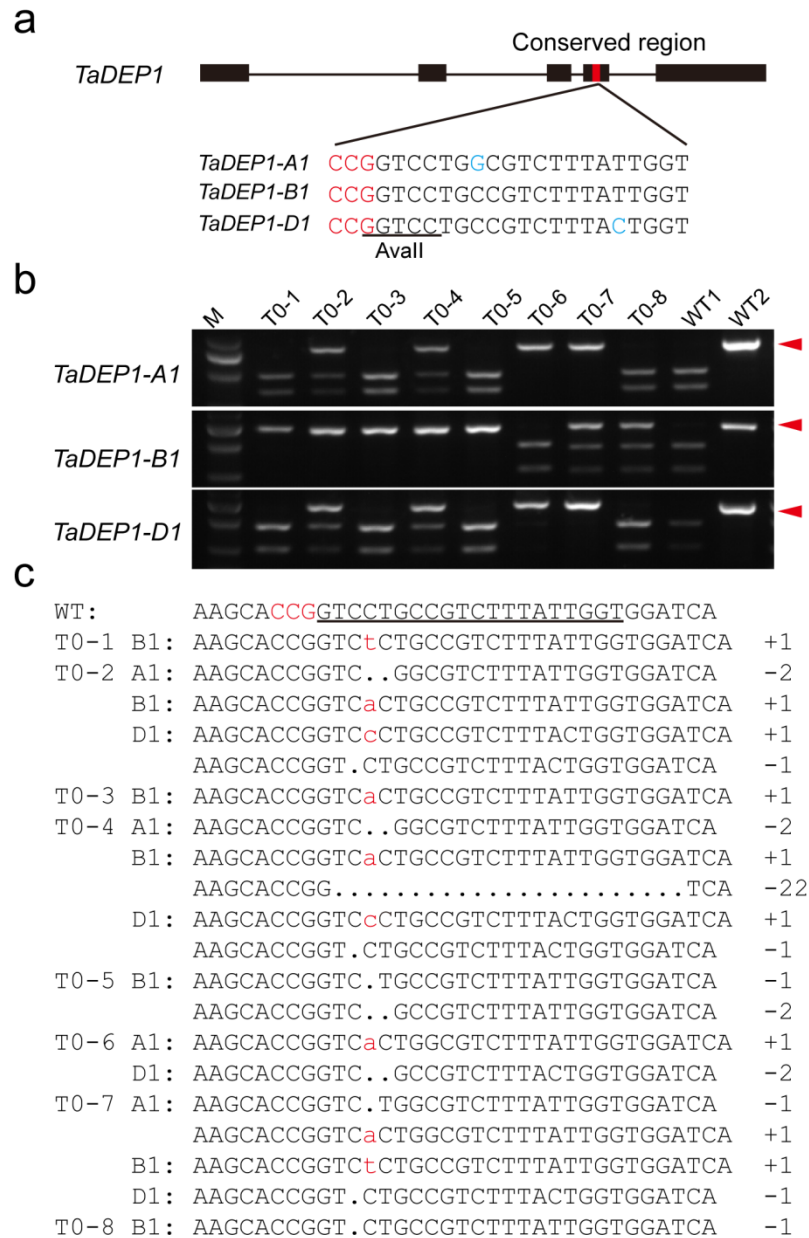

**Supplementary Figure 2.** Outcome of PCR-RE assays for 8 representative *tadep1* mutants. (a) Sites within a conserved region of exon 4 of *TaDEP1* homoeologs targeted by CRISPR/Cas9. Of the two SNPs highlighted in blue. (b) Lanes T0-1 to T0-8 show PCR fragments amplified from independent regenerated wheat plants digested with *AvaII*. Lanes labeled WT1 and WT2 show PCR fragments amplified from a wild type plant with and without *AvaII* digestion, respectively. The bands marked by red arrowheads result from CRISPR/Cas9-induced mutations. (c) Genotypes of 8 representative mutant plants identified by sequencing. “-” and “+” indicate deletion and insertion of the given number of nucleotides, respectively.

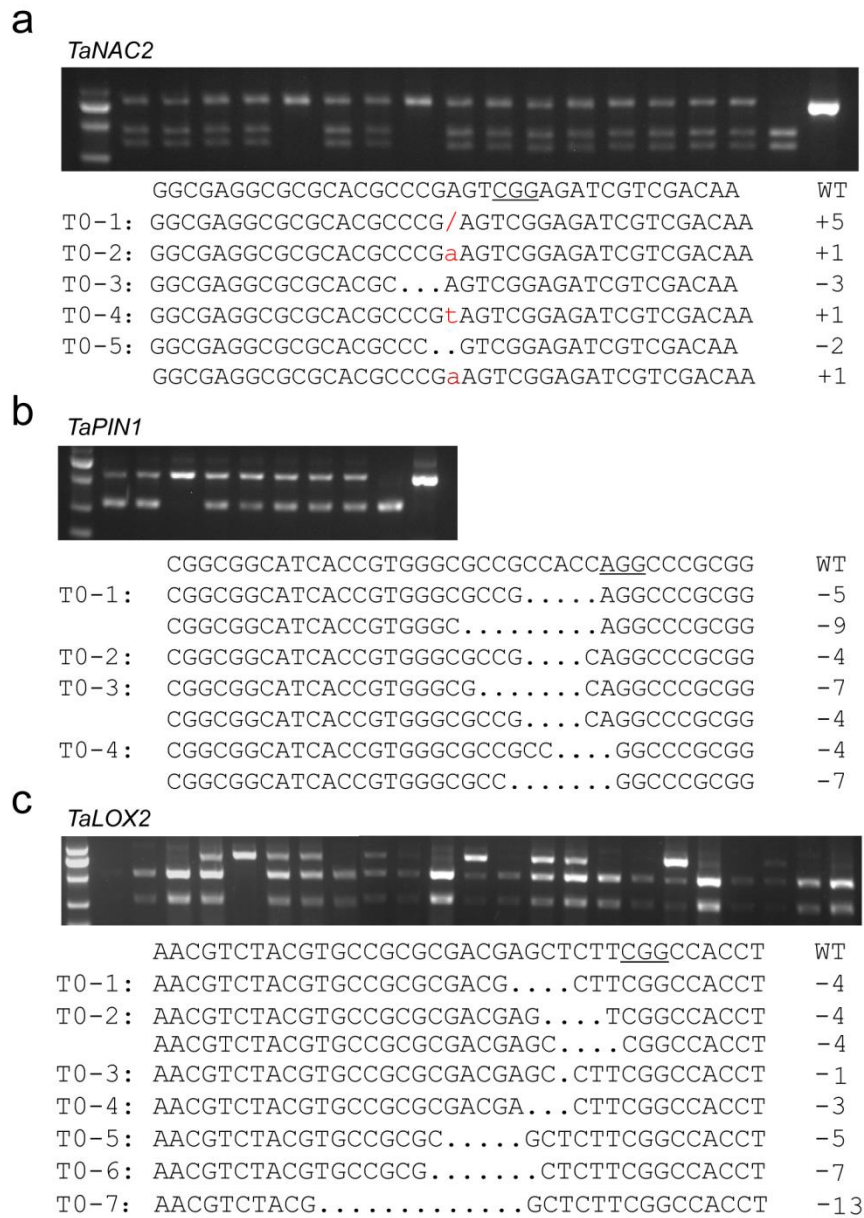

**Supplementary Figure 3.** Outcome of PCR-RE assays for *tanac2* (a), *tapin1* (b) and *talox2* (c) mutants.

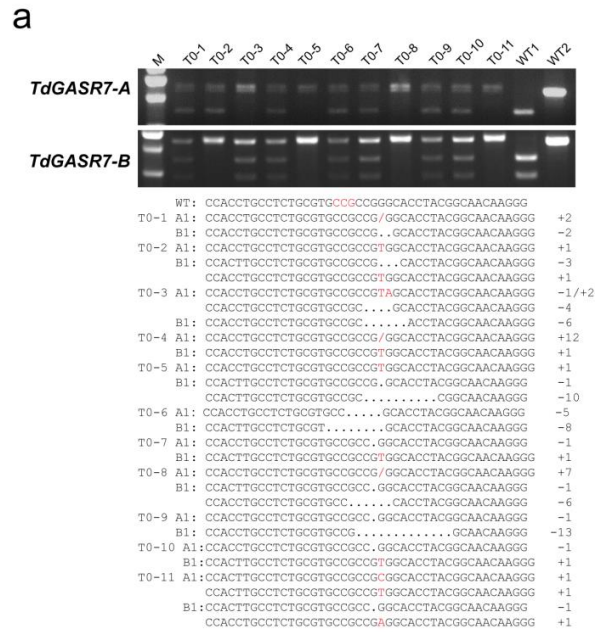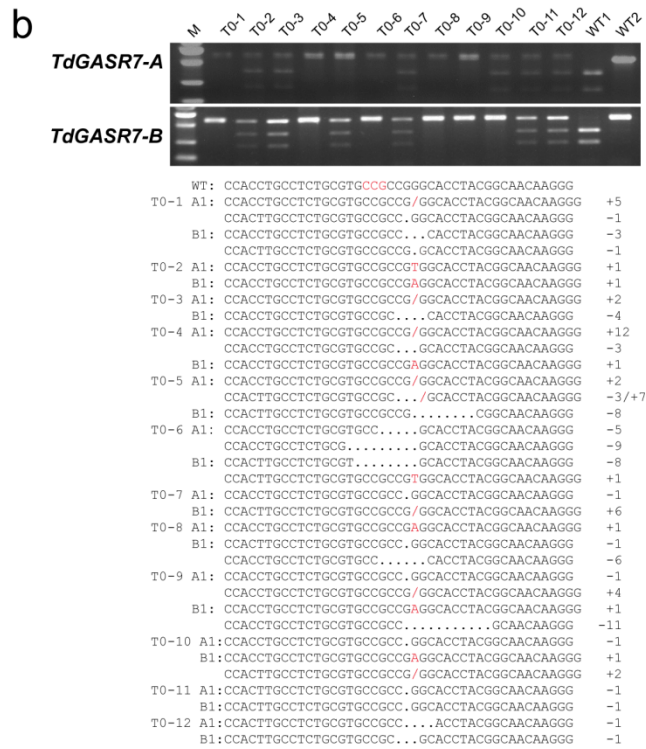

**Supplementary Figure 4.** Outcome of PCR-RE assays for tetraploid *tdgasr7* mutants in Shimai11 (a) and Yumai4 (b) with specific primers.

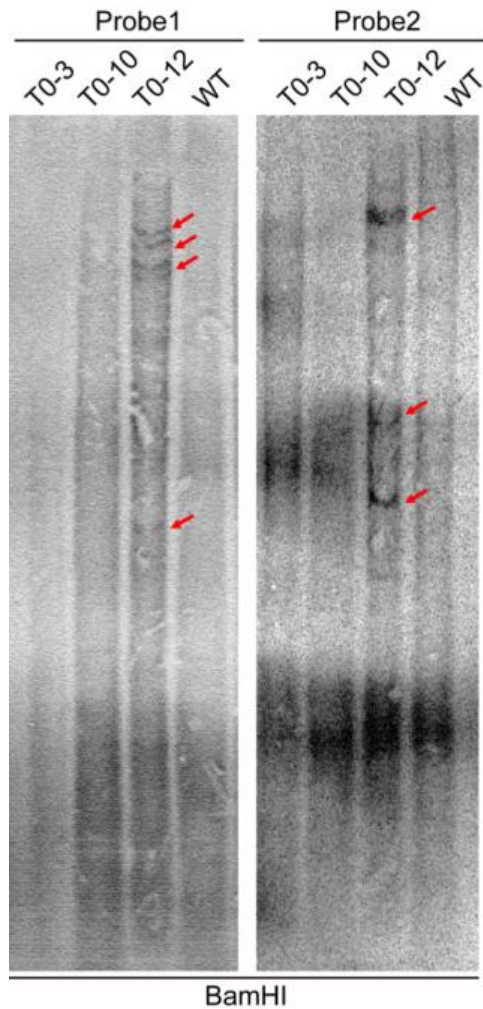

**Supplementary Figure 5.** Outcome of Southern blot analysis for 3 representative *tagasr7* mutant plants. Genomic DNA of wheat was isolated and digested with *Bam*HI. The enzyme-digested products were transferred to a Hybond N<sup>+</sup> membrane and hybridized with two <sup>32</sup>P-labeled probes, probe1 and probe2. T0-3 and T0-10 are transgene-free mutants. T0-12 is a transgenic mutant. WT represents the wild type plant. The bands marked by red arrowheads represent the hybridizing signals in the transgenic mutant.

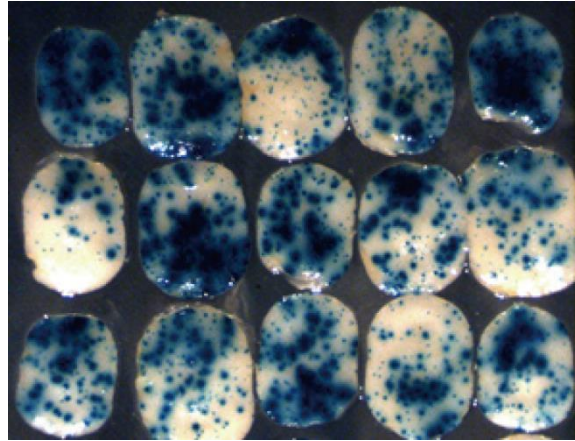

**Supplementary Figure 6.** Outcome of the transient bombardment of wheat immature embryos with *gus* gene. A large number of transfected cells confirmed the high efficiency of DNA transient delivery system.

**Supplementary Table 1. SgRNA target loci and sequences.**

| Gene name | Target site                     | Oligo-F                       | Oligo-R                      | Detection method       |
|-----------|---------------------------------|-------------------------------|------------------------------|------------------------|
| sg-GASR7  | <u>CCG</u> CCGGGCACCTACGGCAAC   | CTTGTTGCCGTAGGT<br>GCCCCG     | AAACCCGGGCACCTACGG<br>CAAC   | PCR/RE<br><i>BclI</i>  |
| sg-DEP1   | <u>CCG</u> GTCTGCGTCTTTATTGGT   | CTTGACCAATAAAGAC<br>GGCAGGAC  | AAACGTCCTGCCGTCTTT<br>ATTGGT | PCR/RE<br><i>AvaII</i> |
| sg-NAC2   | CGAGGCGCGCACGCCCGAGT <u>CGG</u> | CTTGCGAGGCGCGCAC<br>GCCCCGAGT | AAACACTCGGGCGTGCGC<br>GCCTCG | PCR/RE<br><i>AvaI</i>  |
| sg-PIN1   | TCACCGTGGGCGCCGCCACC <u>AGG</u> | CTTGTACCGTGGGCG<br>CCGCCACC   | AAACGGTGGCGCGCCCA<br>CGGTGA  | PCR/RE<br><i>MvaI</i>  |
| sg-LOX2   | GTGCCGCGGACGAGCTCTT <u>CGG</u>  | CTTGTCCGCGCGGACG<br>AGCTCTT   | AAACAAGAGCTCGTCGCG<br>CGGCA  | PCR/RE<br><i>SacI</i>  |
| sg-GW2    | <u>CCT</u> CTAGAAATACCCCATCCTG  | CTTGCAGGATGGGGTA<br>TTTCTAG   | AAACCTAGAAATACCCCA<br>TCCTG  | PCR/RE<br><i>XbaI</i>  |

**Supplementary Table 2. PCR primers and their applications.**

| Primer name                                 | Primer sequence                                                                                                            | Application                                                           |
|---------------------------------------------|----------------------------------------------------------------------------------------------------------------------------|-----------------------------------------------------------------------|
| F1<br>R1                                    | CAGTTAGACATGGTCTAAAGGACAATTGAG<br>CCAACCACACCACATCATCACAACCAA                                                              | Detecting CRISPR construct                                            |
| F2<br>R2                                    | CCTAAGAAGAAGAGAAAGGTCG<br>GCAGATGATAGATTGTGGGGTA                                                                           | Detecting CRISPR construct and<br>labelling probe 1 for Southern blot |
| F3<br>R3                                    | GCCCATCTCTTCGATGACAAGGTTATG<br>CTTCGCAGTGGCCTTGCCAATTC                                                                     | Detecting CRISPR construct                                            |
| F4<br>R4                                    | GGTGGCTTACTCTGTCTCCTGGTT<br>TTCCTTGTCTTCCCTCCTCCTT                                                                         | Detecting CRISPR construct and<br>labelling probe 2 for Southern blot |
| F5<br>R5                                    | AGCCCGTTATTCTGACAGTTCTGGTGC<br>GTGAGCGCAACGCAATTAATGTGAG                                                                   | Detecting CRISPR construct                                            |
| U6-SpeI-F<br>sgRNA-SpeI-R                   | CGGACTAGTGACCAAGCCCCTTATTCTGAC<br>CGGACTAGTAAAAAAGCACCGACTCGGTGCCA<br>C                                                    | Amplifying the fragment of<br>TaU6-sgRNA                              |
| GASR7-F<br>GASR7-R                          | GGAGGTGATGGGAGGTGGGGG<br>CTGGGAGGGCAATTCACATGCCA                                                                           | Amplifying the <i>TaGASR7</i> target site                             |
| GASR7-A1/B1/D1-F                            | CCTTCATCCTTCAGCCATGCAT                                                                                                     | Amplifying the <i>TaGASR7</i> target site                             |
| GASR7-A1-R                                  | CCACTAAATGCCTATCACATACG                                                                                                    | Amplifying the <i>TaGASR7-A1</i> target<br>site                       |
| GASR7-B1-R                                  | AGGGCAATTCACATGCCACTGAT                                                                                                    | Amplifying the <i>TaGASR7-B1</i> target<br>site                       |
| GASR7-D1-R                                  | CCTCCATTTTTCCACATCTTAGTCC                                                                                                  | Amplifying the <i>TaGASR7-D1</i> target<br>site                       |
| DEP1-F<br>DEP1-R                            | CAGCAAACCCCACTTGCATCAGAAC<br>CAGCACAGCCATGAAGCACATATGCA                                                                    | Amplifying the <i>TaDEP1</i> target site                              |
| DEP1-A1/B1/D1-F                             | CCAGCAAACCCCACTTGCATCAGAAC                                                                                                 | Amplifying the <i>TaDEP1</i> target site                              |
| DEP1-A1-R                                   | GTGTACTCTACTGGAAGGAAGGTTACAAG                                                                                              | Amplifying the <i>TaDEP1-A1</i> target<br>site                        |
| DEP1-B1-R                                   | CAGATGAATACTGCGTCCCTACGATAGGT                                                                                              | Amplifying the <i>TaDEP1-B1</i> target<br>site                        |
| DEP1-D1-R                                   | CTGGGCGGGTTCAGTTAGCAGGTTAC                                                                                                 | Amplifying the <i>TaDEP1-D1</i> target<br>site                        |
| NAC2-F<br>NAC2-R                            | GGGATCAAGAAGGCCCTGGTGTFT<br>TCGATCTCGGTATCTGACGGTCTGTG                                                                     | Amplifying the <i>TaNAC2</i> target site                              |
| PIN1-F<br>PIN1-R                            | GATGGACTTCATGATGATCGCC<br>AACGGCACCAGGCGGTACAACGA                                                                          | Amplifying the <i>TaPIN1</i> target site                              |
| LOX2-F<br>LOX2-R                            | CGTCTACCGCTACGACGTCTACAACG<br>GGTCGCCGTACTTGCTCGGATCAAGT                                                                   | Amplifying the <i>TaLOX2</i> target site                              |
| GW2-F<br>GW2-R                              | ATGCCAACCCCTTGCGTGTGCGT<br>TCCTGCTTGTGGGAGCTTTATG                                                                          | Amplifying the <i>TaGW2</i> target site                               |
| GW2-A1-F                                    | CTGCCATTACTTTGTATTTTGGTAATA                                                                                                | Amplifying the <i>TaGW2-A1</i> target site                            |
| GW2-B1-F                                    | GTTGAGATGGCAATCTAAAAGTT                                                                                                    | Amplifying the <i>TaGW2-B1</i> target site                            |
| GW2-D1-F                                    | GCATGTACTTTGATTGTTTGCCTGA                                                                                                  | Amplifying the <i>TaGW2-D1</i> target site                            |
| GW2-A1/B1/D1-R                              | TCCTTCCTCTCTTACCACTTCCC                                                                                                    | Amplifying the <i>TaGW2</i> target site                               |
| T7-GW2-F<br>sgRNA-PCR-R                     | TAATACGACTCACTATAGGCAGGATGGGGTATT<br>TCTAG<br>GCACCGACTCGGTGCCACTT                                                         | Amplifying the T7-GW2-sgRNA                                           |
| ZmUbi-5'UTR-F<br>ZmUbi-KH-5'UTR-R           | TTCCCCAACCTCGTGTGTTCCGGAG<br>ACGACCCATGACAAGCTTTAGCGGTACCCTTGA<br>AGCGGAGGTGCCGACG                                         | Amplifying the 5'UTR of <i>ZmUbi1</i> for<br>pLZT7 cloning            |
| ZmUbi-KH-3'UTR-F<br>ZmUbi-polyA-3'UTR<br>-R | CTCCGCTTCAAGGTTACCGCTAAAGCTTGTCAT<br>GGGTCGTTTAAGCTGC<br>TCTAGATTTTTTTTTTTTTTTTTTTTTTTTTTTT<br>TTTTTTCGCACACACAACACAACCGGT | Amplifying the 3'UTR of <i>ZmUbi1</i> for<br>pLZT7 cloning            |
| KpnI-zCas9-F<br>HindIII-zCas9-R             | GGGGGTACCATGGATTACAAGGACCACGACG<br>CCCAAGCTTCACTTCTTCTTCTCGCCTGC                                                           | Amplifying the KpnI-zCas9-HindIII<br>for pLZT7-zCas9 cloning          |



**Supplementary Table 3.** Genotypes of the 80 T0 *tagasr7* mutants with respect to mutations in the *TaGASR7-A1*, *-B1* and *-D1* homoeologs.

| Genotype of <i>TaGASR7</i> homoeologs | Plant ID | Mutation detected (bp) <sup>a</sup>   | CRISPR -free <sup>b</sup> | Genotype of <i>TaGASR7</i> homoeologs | Plant ID                        | Mutation detected (bp) <sup>a</sup>           | CRISPR -free <sup>b</sup> |
|---------------------------------------|----------|---------------------------------------|---------------------------|---------------------------------------|---------------------------------|-----------------------------------------------|---------------------------|
| AaBBDD                                | T0-4     | +23(Aa)                               | YES                       | AaBbdd                                | T0-8                            | +1(Aa);-1(Bb); -5,+1(dd)                      | NO                        |
|                                       | T0-28    | N.D.                                  | NO                        |                                       | T0-52                           | N.D.                                          | YES                       |
|                                       | T0-36    | +12(Aa)                               | YES                       |                                       | T0-58                           | N.D.                                          | NO                        |
| aaBBDD                                | N.A.     |                                       | T0-66                     |                                       | N.D.                            | YES                                           |                           |
| AABbDD                                | T0-6     | -8(Bb)                                | NO                        | AabbDd                                | T0-31                           | +1(Aa); -4/+1, +1(bb); +8(Dd)                 | YES                       |
|                                       | T0-49    | +123(Bb)                              | YES                       |                                       | T0-33                           | N.D.                                          | NO                        |
| AAbbDD                                | N.A.     |                                       | T0-50                     |                                       | N.D.                            | NO                                            |                           |
| AABBdd                                | T0-3     | -1/+2(Dd)                             | YES                       |                                       | T0-55                           | N.D.                                          | NO                        |
|                                       | T0-30    | N.D.                                  | NO                        | T0-69                                 | N.D.                            | YES                                           |                           |
|                                       | T0-56    | N.D.                                  | NO                        | T0-76                                 | N.D.                            | NO                                            |                           |
|                                       | T0-79    | +1(Dd)                                | YES                       | T0-78                                 | N.D.                            | NO                                            |                           |
| AABBdd                                | T0-71    | +63, -1(dd)                           | YES                       | Aabddd                                | T0-16                           | -6/+1(Aa); -25(bb); +1,-26(dd)                | YES                       |
| AaBbDD                                | T0-15    | +82(Aa); -1(Bb)                       | NO                        |                                       | T0-23                           | -4(Aa); +1,+89(bb); -6,+1(dd)                 | NO                        |
|                                       | T0-44    | N.D.                                  | YES                       |                                       | T0-38                           | N.D.                                          | NO                        |
|                                       | T0-60    | N.D.                                  | NO                        |                                       | T0-40                           | N.D.                                          | NO                        |
| AabbDD                                | T0-10    | -1(Aa); +1(bb)                        | YES                       |                                       | T0-45                           | N.D.                                          | YES                       |
|                                       | T0-14    | -1(Aa);                               | NO                        |                                       | T0-68                           | N.D.                                          | YES                       |
| aaBbDD                                | T0-7     | -1, +1(aa); +1(Bb)                    | YES                       | aaBbDd                                | T0-19                           | +129,+1(aa);-2/+1(Bb);-16(Dd)                 | NO                        |
|                                       | T0-12    | -3/+1(aa); -1(Bb)                     | NO                        |                                       | T0-32                           | N.D.                                          | NO                        |
| AaBBdd                                | T0-35    | +1(Aa); +1(Dd)                        | NO                        |                                       | T0-57                           | N.D.                                          | NO                        |
|                                       | T0-51    |                                       | YES                       |                                       | T0-59                           | N.D.                                          | NO                        |
|                                       | T0-61    | +2(Aa); -6(Dd)                        | YES                       | T0-64                                 | N.D.                            | NO                                            |                           |
|                                       | T0-77    | N.D.                                  | YES                       | T0-17                                 | -2,-3(aa); -1(Bb); -10,-7(dd)   | NO                                            |                           |
| AaBBdd                                | T0-1     | +1(Aa); -1/+2(dd)                     | YES                       | aaBbdd                                | T0-26                           | N.D.                                          | NO                        |
| aaBBdd                                | T0-9     | -1(aa); -11(Dd)                       | NO                        |                                       | T0-41                           | +8,-1(aa);+24(Bb); +25,+1(dd)                 | YES                       |
| aaBBdd                                | N.A.     |                                       |                           |                                       | T0-54                           | N.D.                                          | YES                       |
| aabbDD                                | N.A.     |                                       |                           |                                       | T0-62                           | N.D.                                          | NO                        |
| AABbDd                                | T0-22    | +1(Bb); -3(Dd)                        | NO                        |                                       | T0-70                           | N.D.                                          | NO                        |
|                                       | T0-24    | -7(Bb); +82(Dd)                       | NO                        |                                       | T0-13                           | +1(aa); +1,-12(bb); -1(Dd)                    | NO                        |
|                                       | T0-42    | N.D.                                  | YES                       | T0-37                                 | +3,-1(aa); +1,-2/+1(bb); -2(Dd) | YES                                           |                           |
|                                       | T0-46    | N.D.                                  | NO                        | T0-43                                 | N.D.                            | YES                                           |                           |
| T0-74                                 | N.D.     | NO                                    | T0-63                     | N.D.                                  | NO                              |                                               |                           |
| AABbdd                                | T0-11    | +1(Bb); -26, +1(dd)                   | YES                       | T0-80                                 | N.D.                            | YES                                           |                           |
| AAbbDd                                | N.A.     |                                       |                           | AaBbDd                                | T0-2                            | +1(Aa); +1(Bb); +1(Dd)                        | NO                        |
| AAbbdd                                | N.A.     |                                       |                           |                                       | T0-18                           | -4/+1(Aa); +2(Bb); +1(Dd)                     | NO                        |
| aabddd                                | T0-5     | +1,-7/+15(aa); -1,-10(bb); +1,-37(dd) | YES                       |                                       | T0-20                           | -6(Aa); -17(Bb); +5(Dd)                       | YES                       |
|                                       | T0-27    | +1(aa); -1,-7(bb); -5,+1(dd)          | YES                       |                                       | T0-21                           | -5/+1(Aa); +1(Bb); +1, -19/+166, -19/+167(Dd) | NO                        |
|                                       | T0-29    | -4/+1(aa); +63,+1(bb); +1,-1(dd)      | YES                       |                                       | T0-25                           | +1(Aa); -9(Bb); -1(Dd)                        | NO                        |
|                                       | T0-39    | N.D.                                  | NO                        |                                       | T0-34                           | N.D.                                          | NO                        |
|                                       | T0-47    | N.D.                                  | NO                        |                                       | T0-48                           | N.D.                                          | YES                       |
|                                       | T0-65    | N.D.                                  | YES                       |                                       | T0-53                           | N.D.                                          | YES                       |
|                                       | T0-73    | N.D.                                  | NO                        |                                       | T0-67                           | N.D.                                          | NO                        |
|                                       | T0-75    | N.D.                                  | NO                        |                                       | T0-72                           | N.D.                                          | YES                       |

N.A., not available, these mutant types were not obtained from the experiments. N.D., not detected.  
<sup>a</sup>“−” indicates deletion of the indicated number of nucleotides; “+” indicates insertion of the indicated number of nucleotides; “−/+” indicates simultaneous deletion and insertion of the indicated number of nucleotides at the same site. <sup>b</sup>Based on the absence of mutant plants harboring CRISPR DNA construct or not.

**Supplementary Table 4.** Potential off-target sites for TaGASR7-sgRNA and TaGW2-sgRNA in wheat.

| Target                       | Site name              | Sequence                       | Forward primer sequence   | Reverse primer sequence   |
|------------------------------|------------------------|--------------------------------|---------------------------|---------------------------|
| Target 1<br>( <i>GASR7</i> ) | GASR7                  | <u>CCG</u> CCGGGCACCTACGGCAAC  |                           |                           |
|                              | OT1-1                  | GTcGtCGTAGGTGCCCGGCGG          | CTCGCTCAGGTTCTGGGCTTCTT   | CGGGTCCCATATCCCTCTCTCCTA  |
|                              | OT1-2                  | GTTGCCGccGGTGCCCGGTGG          | GTTCTGTTCTCACGACGGTGGAGAC | TAGGTGCCCGTCTCTTTTCGTACAG |
|                              | OT1-3                  | GgaGCCGTcGGTGCCCGGAGG          | TCCGATGGCCGAAACTCGACTTC   | TTGTCGTGCCTTCGCATCTCAAG   |
|                              | OT1-4                  | GTcGCCGTcCGTGCCCGGCGG          | GAGGAGCTGATCCTCTGTTCAATC  | GAAGGAGAGGATCCCCGAGCTGCT  |
|                              | OT1-5                  | GTTCCCGTgGgGcGCCCGGGG          | TCGCGTGTGGTGTCTGGGAAG     | TCCATGCTAACTTACACCCAATTG  |
|                              | OT1-6                  | cTTGgCGTAcGTGCCCGGCGG          | AAGTCCGCGCATGCATGAGTTCC   | GCACCTTGCACTGACATATACTCC  |
|                              | OT1-7                  | GTTcCCaTgGGTGCCCGGGG           | TGAGGTCTGGTGCCTACACGAA    | GTGTGCCACTGAGATGTAGCAT    |
|                              | OT1-8                  | GTTGaCcTtGGTGCCCGGCGG          | ACTTGTCTCGCCCTTCTGCTT     | ATGGTCACTATCACCACAAGA     |
|                              | OT1-9                  | GTTGCaGcAcGTGCCCGGCGG          | GGTTATCAAAGGTCTCCAACAACA  | ATCGCTTACCCTGTGAGAACG     |
|                              | OT1-10                 | cTcGCCGTaGTGCCCGGCGG           | CGCTTCACTTCAAGTCAATGTTT   | TGGACTGGTGTTTACCCTTTGTT   |
|                              | OT1-11                 | GTgGtCGgAGGTGCCCGGAGG          | GGAACGATGGCAGTGACGATGA    | TCCCTTTGTTCCCGCACTTAGT    |
|                              | OT1-12                 | tTTGCCcTAGGaGCCCGGAGG          | CATAAATGGAGTGAGGATGAACGTG | CGTTTATCTTACCAGGCGGAC     |
|                              | OT1-13                 | GTTGaCGgAGaTGCCCGGAGG          | ACGCTTCTCTGGGCTCTTAGG     | CAAACCTGCTGACCCACCTGTC    |
|                              | OT1-14                 | cTTGtCGgAGaTGCCCGGCGG          | CCTTCACTATCCGCGTCCAGA     | CGCATCAAACGCAGCAACTTGT    |
|                              | OT1-15                 | GgcGCgcTAGGTGCCCGGCGG          | GATGCCCAGAACAAGGAGTTCG    | GCCGCACAGGTCGTAGTTGTCA    |
|                              | OT1-16                 | GTTcaCcTtGGTGCCCGGCGG          | GGTGTGGCATCATCATCATCT     | ATCGTCACCATCACCACAAGA     |
|                              | OT1-17                 | GTcGCgcTAcGTGCCCGGCGG          | AATGGACGCCAGAACAAGGAG     | AGGACGTAGGAGTGAACGGCA     |
|                              | OT1-18                 | GacGCgGTAGGaGCCCGaGGG          | GAGGAGGAGAACACGTTGTCC     | AAAGCAAATGATGCCTCCCAGC    |
|                              | OT1-19                 | GTcGaaGTgGGTGCgCGGCGG          | CCATTGCCCTTACCACATCT      | CCTTGTATGCTGATGTATCGTGC   |
|                              | OT1-20                 | cgTcgCGTAcGTGCCCGGCGG          | CACCGTGTCAAGTCAAGGAC      | GAAGTAAGTGGCAGGACCCCT     |
|                              | OT1-21                 | GgcGCaGgAGGaGCCCGGCGG          | GGAAGGACGAGGAGAAGAAGAG    | GAACTCGGACAGCATCTACGAC    |
|                              | OT1-22                 | agaGAcGgAGGTGCCCGGCGG          | AGGTCTCACCGCAACTCGTAT     | CGTTTGTGGACTGGCAGGAAAT    |
|                              | OT1-23                 | GcTcCtGTAGcTGCgCGGCGG          | CAGCGGCAGCCTCCATAAAGAG    | CGCCGTTTCACTGGCATAACAAG   |
| OT1-24                       | GaTGtaGTAcGTcGCCCGGCGG | GGTCTTTCACCCACCCGAATC          | CAACTACTGCCGATTTTCGTGCT   |                           |
| Target 2<br>( <i>GW2</i> )   | GW2                    | <u>CCT</u> CTAGAAATACCCCATCCTG |                           |                           |
|                              | OT2-1                  | tAaGATGGGtTATTTCTAGAGG         | AAACTCAGCGTAAATCTGGCG     | CCGAGACAACAATGGACCAA      |
|                              | OT2-2                  | gAGGATGGGaTtTTTCTAGAGG         | GATGACAACGGGTGGCAAGAG     | TGCCATCACCTCCCTACATCG     |
|                              | OT2-3                  | aAGaATGGGccATTTCTAGAGG         | CCCTCTGGTAACTCTTCGTTC     | TCTCTGATGTGCTATGTTCCA     |
|                              | OT2-4                  | aAGaATGGGtcATTTCTAGAGG         | CTGCCTCTTGTACCATCCAC      | TCATCATTTGCTTCTCTCTG      |
|                              | OT2-5                  | CgGcATGGaGTATaTCTAGAGG         | AATACCAACTAAGCCTGAGCAA    | ACTCCCTAGACCAGAAGCAGC     |
|                              | OT2-6                  | CcGGAgGGaGTATgTCTAGAGG         | GCGTATTACATTCGTGTCAAGT    | TCAAACAACAGTTACCGCAAC     |
|                              | OT2-7                  | ttGGaAGGGGgATTTCTAGAGG         | AAAGCAATGGGCACAAGTCT      | GTATTCCGTGATTTCTGCGTT     |
|                              | OT2-8                  | gAGGAcAGaGgATTTCTAGAGG         | GCAGAAGCAGCAACTAATAAGAAG  | TCATTACAGAGCAGTCAGAAGC    |

**Supplementary Table 5.** Molecular and genetic analysis of CRISPR/Cas9-induced mutations in *TaGASR7*, *TaDEP1* and *TaLOX2* homoeologs and their transmission to the T1 generation.

| Gene name | Wheat variety | Plant ID | Analysis of T0 plants  |                                     |             | Segregation of mutations in the T1 generation |           |         |         |                                        |                              |
|-----------|---------------|----------|------------------------|-------------------------------------|-------------|-----------------------------------------------|-----------|---------|---------|----------------------------------------|------------------------------|
|           |               |          | Genotype of homoeologs | Mutation detected (bp) <sup>a</sup> | CRISPR-free | No. of tested plants                          | Wild type | Hetero  | Homo    | Mutation Transmission (%) <sup>b</sup> | CRISPR-free (%) <sup>c</sup> |
| sg-GASR7  | Bobwhite      | T0-1     | Aa                     | +1                                  | YES         | 26                                            | 7 (AA)    | 13 (Aa) | 6 (aa)  | 73.1 <sup>d</sup>                      | 100                          |
|           |               |          | BB                     |                                     |             |                                               | 26 (BB)   | 0 (Bb)  | 0 (bb)  |                                        |                              |
|           |               |          | dd                     | -1/+2                               |             |                                               | 0 (DD)    | 0 (Dd)  | 26 (dd) | 100                                    |                              |
|           |               | T0-5     | aa                     | +1, -7/+15                          | YES         | 44                                            | 0 (AA)    | 0 (Aa)  | 44 (aa) | 100                                    | 100                          |
|           |               |          | bb                     | -1, -10                             |             |                                               | 0 (BB)    | 0 (Bb)  | 44 (bb) | 100                                    |                              |
|           |               |          | dd                     | +1, -37                             |             |                                               | 0 (DD)    | 0 (Dd)  | 44 (dd) | 100                                    |                              |
|           |               | T0-10    | Aa                     | -1                                  | YES         | 35                                            | 10 (AA)   | 16 (Aa) | 9 (aa)  | 71.4 <sup>d</sup>                      | 100                          |
|           |               |          | bb                     | +1                                  |             |                                               | 0 (BB)    | 0 (Bb)  | 35 (bb) | 100                                    |                              |
|           |               |          | DD                     |                                     |             |                                               | 35 (DD)   | 0 (Dd)  | 0 (dd)  |                                        |                              |
|           |               | T0-16    | Aa                     | -6/+1                               | YES         | 30                                            | 9 (AA)    | 14 (Aa) | 7 (aa)  | 70.0 <sup>d</sup>                      | 100                          |
|           |               |          | bb                     | -25                                 |             |                                               | 0 (BB)    | 0 (Bb)  | 30 (bb) | 100                                    |                              |
|           |               |          | dd                     | +1, -26                             |             |                                               | 0 (DD)    | 0 (Dd)  | 30 (dd) | 100                                    |                              |
|           |               | T0-20    | Aa                     | -6                                  | YES         | 29                                            | 8 (AA)    | 14 (Aa) | 7 (aa)  | 72.4 <sup>d</sup>                      | 100                          |
|           |               |          | Bb                     | -17                                 |             |                                               | 7 (BB)    | 15 (Bb) | 7 (bb)  | 75.9 <sup>d</sup>                      |                              |
|           |               |          | Dd                     | +5                                  |             |                                               | 8 (DD)    | 15 (Dd) | 6 (dd)  | 72.4 <sup>d</sup>                      |                              |
|           |               | T0-36    | Aa                     | +12                                 | YES         | 29                                            | 9 (AA)    | 14 (Aa) | 6 (aa)  | 69.0 <sup>d</sup>                      | 100                          |
|           |               |          | BB                     |                                     |             |                                               | 29 (BB)   | 0 (Bb)  | 0 (bb)  |                                        |                              |
|           |               |          | DD                     |                                     |             |                                               | 29 (DD)   | 0 (Dd)  | 0 (dd)  |                                        |                              |
| sg-LOX2   | Kenong 199    | T0-3     | Dd                     | -1                                  | YES         | 23                                            | 5 (DD)    | 14 (Dd) | 4 (dd)  | 78.3 <sup>d</sup>                      | 100                          |
|           |               | T0-16    | Dd                     | -7                                  | YES         | 42                                            | 8 (DD)    | 24 (Dd) | 10 (dd) | 81.0 <sup>d</sup>                      | 100                          |
|           |               | T0-22    | dd                     | -3, -5                              | YES         | 30                                            | 0 (DD)    | 0 (Dd)  | 30 (dd) | 100                                    | 100                          |
|           |               | T0-35    | dd                     | -2, -9                              | YES         | 52                                            | 0 (DD)    | 0 (Dd)  | 52 (dd) | 100                                    | 100                          |
|           |               | T0-65    | dd                     | +7,-10                              | YES         | 18                                            | 0 (DD)    | 0 (Dd)  | 18 (dd) | 100                                    | 100                          |
|           |               | T0-68    | Dd                     | -11                                 | YES         | 28                                            | 7 (DD)    | 16 (Dd) | 5 (dd)  | 75.0 <sup>d</sup>                      | 100                          |

**Supplementary Table 5.** Molecular and genetic analysis of CRISPR/Cas9-induced mutations in *TaGASR7*, *TaDEP1* and *TaLOX2* homoeologs and their transmission to the T1 generation (continued).

| Gene name | Wheat variety | Plant ID | Analysis of T0 plants  |                                     |             | Segregation of mutations in the T1 generation |           |         |         |                                        |                              |
|-----------|---------------|----------|------------------------|-------------------------------------|-------------|-----------------------------------------------|-----------|---------|---------|----------------------------------------|------------------------------|
|           |               |          | Genotype of homoeologs | Mutation detected (bp) <sup>a</sup> | CRISPR-free | No. of tested plants                          | Wild type | Hetero  | Homo    | Mutation Transmission (%) <sup>b</sup> | CRISPR-free (%) <sup>c</sup> |
| sg-DEP1   | Kenong 199    | T0-2     | Aa                     | -2                                  | YES         | 3                                             | 1 (AA)    | 2 (Aa)  | 0 (aa)  | 66.7                                   | 100                          |
|           |               |          | bb                     | +1                                  |             |                                               | 0 (BB)    | 0 (Bb)  | 3 (bb)  | 100                                    |                              |
|           |               |          | dd                     | +1, -1                              |             |                                               | 0 (DD)    | 0 (Dd)  | 3 (dd)  | 100                                    |                              |
|           |               | T0-7     | aa                     | -1, +1                              | YES         | 32                                            | 0 (AA)    | 0 (Aa)  | 32 (aa) | 100                                    | 100                          |
|           |               |          | Bb                     | +1                                  |             |                                               | 9 (BB)    | 16 (Bb) | 7 (bb)  | 71.8 <sup>d</sup>                      |                              |
|           |               |          | dd                     | -1                                  |             |                                               | 0 (DD)    | 0 (Dd)  | 32 (dd) | 100                                    |                              |
|           |               | T0-8     | AA                     |                                     | YES         | 37                                            | 37 (AA)   | 0 (Aa)  | 0 (aa)  |                                        | 100                          |
|           |               |          | Bb                     | -1                                  |             |                                               | 7 (BB)    | 24 (Bb) | 6 (bb)  | 81.1 <sup>d</sup>                      |                              |
|           |               |          | DD                     |                                     |             |                                               | 37 (DD)   | 0 (Dd)  | 0 (dd)  |                                        |                              |
|           |               | T0-12    | Aa                     | -3                                  | YES         | 18                                            | 4 (AA)    | 8 (Aa)  | 6 (aa)  | 77.8 <sup>d</sup>                      | 100                          |
|           |               |          | Bb                     | +5                                  |             |                                               | 5 (BB)    | 10 (Bb) | 3 (bb)  | 72.2 <sup>d</sup>                      |                              |
|           |               |          | DD                     |                                     |             |                                               | 18 (DD)   | 0 (Dd)  | 0 (dd)  |                                        |                              |
|           |               | T0-14    | AA                     |                                     | YES         | 17                                            | 17 (AA)   | 0 (Aa)  | 0 (aa)  |                                        | 100                          |
|           |               |          | Bb                     | +2                                  |             |                                               | 4 (BB)    | 8 (Bb)  | 5 (bb)  | 76.5 <sup>d</sup>                      |                              |
|           |               |          | Dd                     | -1/+10                              |             |                                               | 3 (DD)    | 10 (Dd) | 4 (dd)  | 82.3 <sup>d</sup>                      |                              |
|           |               | T0-23    | Aa                     | +1                                  | YES         | 24                                            | 6 (AA)    | 14 (Aa) | 4 (aa)  | 75.0 <sup>d</sup>                      | 100                          |
|           |               |          | Bb                     | +4                                  |             |                                               | 6 (BB)    | 13 (Bb) | 5 (bb)  | 75.0 <sup>d</sup>                      |                              |
|           |               |          | dd                     | -12, -16                            |             |                                               | 0 (DD)    | 0 (Dd)  | 24 (dd) | 100                                    |                              |

Hetero, heterozygous; Homo, homozygous.

<sup>a</sup>“-” indicates deletion of the indicated number of nucleotides; “+” indicates insertion of the indicated number of nucleotides; “-/+” indicates simultaneous deletion and insertion of the indicated number of nucleotides at the same site. <sup>b</sup>Based on the number of plants carrying the observed mutations over the total number of plants tested. <sup>c</sup>Based on the number of mutant plants not harboring CRISPR DNA over the total number of mutant plants tested. <sup>d</sup>Segregation of the heterozygous lines conforms to a Mendelian 1:2:1 ratio according to the  $\chi^2$  test ( $P > 0.05$ ).
